# Supplementary material
Source: publisher figshare collection journal article supplement (https://acs.figshare.com/ndownloader/files/28150008)
Supplement: Supplementary file 1 [file 28150008]

# Supplementary information for the paper “Topological Graphene plasmons in a plasmonic realization of the Su-Schrieffer-Heeger Model”

Tatiana G. Rappoport,<sup>1,2</sup> Yuliy V. Bludov,<sup>3</sup> Frank H. L. Koppens,<sup>4,5</sup> and Nuno M. R. Peres<sup>3,6</sup>

<sup>1</sup>*Instituto de Telecomunicações, Instituto Superior Técnico,  
University of Lisbon, Avenida Rovisco Pais 1, Lisboa, 1049001 Portugal*

<sup>2</sup>*Instituto de Física, Universidade Federal do Rio de Janeiro,  
Caixa Postal 68528, 21941-972 Rio de Janeiro RJ, Brazil*

<sup>3</sup>*Department and Centre of Physics, and QuantaLab,  
University of Minho, Campus of Gualtar, 4710-057, Braga, Portugal*

<sup>4</sup>*ICFO-Institut de Ciències Fotoniques, The Barcelona Institute of  
Science and Technology, 08860 Castelldefels (Barcelona), Spain*

<sup>5</sup>*ICREA-Institució Catalana de Recerca i Estudis Avançats, Barcelona, Spain*

<sup>6</sup>*International Iberian Nanotechnology Laboratory (INL),  
Av. Mestre José Veiga, 4715-330, Braga, Portugal*

## I. SEMI-ANALYTICAL APPROACH TO THE MODELLING OF GRAPHENE PLASMONIC CRYSTAL.

We consider the structure, depicted in Fig. 1. The graphene layer is deposited on top of the semi-infinite substrate, which is characterized by the dielectric constant  $\varepsilon_S$  and occupies the half-space  $z > W + d$ . From other side the graphene layer is covered with a spacer layer, which dielectric constant and thickness are  $\varepsilon_d$  and  $d$ , respectively. An array of metallic rods (PECs) with cross-section  $W \times W$  is deposited on top of the capping layer. The Period consists of two separations of widths  $a$  and  $b$ , while distances between neighbouring rods  $W$  are equal. Thus, the period of the structure is equal to  $L = 2W + a + b$ . In details, slits of width  $a$  are arranged at  $-(W + a + b)/2 + lL < x < -(W - a + b)/2 + lL$ , while slits of width  $b$  are arranged at  $(W + a - b)/2 + lL < x < (W + a + b)/2 + lL$  (here  $l$  is the number of period).

### A. Main equations

Assuming electromagnetic field time-dependence as  $\mathbf{E}, \mathbf{H} \sim \exp -i\omega t$ , we represent Maxwell equations for p-polarized wave as

$$\frac{\partial E_x^{(j)}}{\partial z} - \frac{\partial E_z^{(j)}}{\partial x} = \frac{i\omega}{c} H_y^{(j)}, \quad (1)$$

$$-\frac{\partial H_y^{(j)}}{\partial z} = -\frac{i\omega}{c} \varepsilon^{(j)} E_x^{(j)}, \quad (2)$$

$$\frac{\partial H_y^{(j)}}{\partial x} = -\frac{i\omega}{c} \varepsilon^{(j)} E_z^{(j)}. \quad (3)$$

where  $\omega$  is wave cyclic frequency,  $c$  is the velocity of light in vacuum. The superscripts  $j = 1, 2, 3, 4$  correspond to the spatial domains  $z < 0$ ,  $0 < z < W$ ,  $W < z < W + d$ , and  $z > W + d$ , respectively. Also for the sake of simplicity we will admit, that the dielectric constant of all media are  $\varepsilon^{(j)} = 1$ .

In the medium  $j = 1$  the solutions of Maxwell equation can be represented as

$$\begin{pmatrix} H_y^{(1)}(x, z) \\ E_x^{(1)}(x, z) \end{pmatrix} = \sum_{m=-\infty}^{\infty} \hat{F}_m \begin{pmatrix} H_y^{(i)} \delta_{m,0} \exp [ip_m^{(1)} z] \\ H_y^{(r)} \exp [-ip_m^{(1)} z] \end{pmatrix} \exp \left[ i \left( k_x + \frac{2\pi m}{L} \right) x \right], \quad (4)$$

where

$$\hat{F}_m = \begin{pmatrix} 1 & 1 \\ \frac{cp_m}{\omega} & -\frac{cp_m}{\omega} \end{pmatrix} \text{ is the field matrix, and } p_m = \sqrt{\left(\frac{\omega}{c}\right)^2 - \left(k_x + \frac{2\pi m}{L}\right)^2}$$

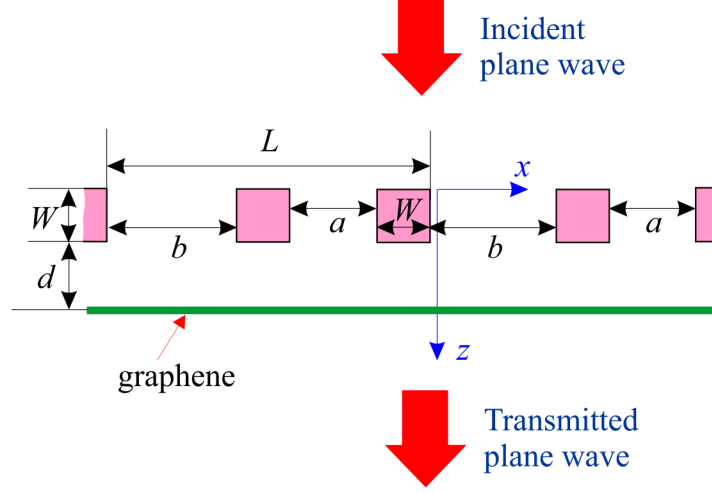

FIG. 1. Geometry of problem: diffraction grating made of PEC, arranged above the graphene monolayer.

is the out-of-plane wavevector component of  $m$ th harmonics,  $H_y^{(i)}$  and  $H_{y||m}^{(r)}$  are the amplitudes of the magnetic field of incident and reflected wave of  $m$ th harmonics,  $k_x$  is the in-plane wavevector component of incident wave. Inside the substrate,  $j = 4$ , the electromagnetic field can be expressed as

$$\begin{pmatrix} H_y^{(4)}(x, z) \\ E_x^{(4)}(x, z) \end{pmatrix} = \sum_{m=-\infty}^{\infty} \hat{F}_m \begin{pmatrix} H_y^{(t)} \exp[ip_m(z - W - d)] \\ 0 \end{pmatrix} \exp\left[i\left(k_x + \frac{2\pi m}{L}\right)x\right]. \quad (5)$$

$$(6)$$

In Eq. (5) zero in the second line means absence of the backward-propagating waves. Inside the finite medium  $j = 3$  electromagnetic fields can be represented in form of the transfer-matrix

$$\hat{Q}_m(z) = \begin{pmatrix} \cos[p_m z] & \frac{i\omega}{cp_m} \sin[p_m z] \\ \frac{icp_m}{\omega} \sin[p_m z] & \cos[p_m z] \end{pmatrix},$$

i.e.

$$\begin{pmatrix} H_y^{(3)}(x, z) \\ E_x^{(3)}(x, z) \end{pmatrix} = \sum_{m=-\infty}^{\infty} \hat{Q}_m(z - W - d) \begin{pmatrix} h_{y||m}^{(3)}(W + d) \\ e_{x||m}^{(3)}(W + d) \end{pmatrix} \exp\left[i\left(k_x + \frac{2\pi m}{L}\right)x\right].$$

Electromagnetic fields across the graphene are linked through the boundary conditions, namely

$$\begin{pmatrix} h_{y||m}^{(3)}(W + d) \\ e_{x||m}^{(3)}(W + d) \end{pmatrix} = \hat{Q}_g \begin{pmatrix} h_{y||m}^{(4)}(W + d) \\ e_{x||m}^{(4)}(W + d) \end{pmatrix} \quad (7)$$

with the matrix

$$\hat{Q}_m^{(g)} = \begin{pmatrix} 1 & \frac{4\pi}{c} \sigma_g(\omega) \\ 0 & 1 \end{pmatrix}.$$

Here  $\sigma_g(\omega)$  is the Drude-like expression for graphene's conductivity, whose form is given in the main text. If this boundary condition is applied, one can obtain the expression for the electromagnetic fields at  $z = W$  as

$$\begin{pmatrix} H_y^{(3)}(x, W) \\ E_x^{(3)}(x, W) \end{pmatrix} = \sum_{m=-\infty}^{\infty} \hat{F}_m^{(tot)} \begin{pmatrix} H_y^{(t)} \\ 0 \end{pmatrix} \exp\left[i\left(k_x + \frac{2\pi m}{L}\right)x\right], \quad (8)$$

where

$$\hat{F}_m^{(tot)} = \hat{Q}_m(-d) \hat{Q}_m^{(g)} \hat{F}_m$$

is the total field matrix.

In the medium  $j = 2$ , the electromagnetic field can be represented as the superposition of waveguide modes inside the slits. Thus, inside the spatial domain  $-(W + a + b)/2 + lL < x < -(W - a + b)/2 + lL$  (slits of width  $a$ ) the tangential components of the electromagnetic field can be written as

$$\begin{pmatrix} H_{y||l}^{(2,a)}(x, z) \\ E_{x||l}^{(2,a)}(x, z) \end{pmatrix} = ia \sum_{n=0}^{\infty} \cos \left[ \frac{n\pi}{a} \left( x + \frac{W + a + b}{2} - lL \right) \right] \times \begin{pmatrix} \omega/c & \omega/c \\ \nu_n^{(a)} & -\nu_n^{(a)} \end{pmatrix} \begin{pmatrix} A_n^{(+,l)} \exp[i\nu_n^{(a)} z] \\ A_n^{(-,l)} \exp[-i\nu_n^{(a)}(z - W)] \end{pmatrix}, \quad (9)$$

where  $\nu_n^{(a)} = \sqrt{\left(\frac{\omega}{c}\right)^2 - \left(\frac{n\pi}{a}\right)^2}$ ,  $l$  is the number of period,  $A_n^{(\pm, l)}$  are the amplitudes of forward- and backward-propagating waves of the  $n$ th eigenmode in the  $l$ th slit. In the similar manner, inside the spatial domain  $(W + a - b)/2 + lL < x < (W + a + b)/2 + lL$  (slits of width  $b$ ) the tangential component of the electromagnetic waves are

$$\begin{pmatrix} H_{y||l}^{(2,b)}(x, z) \\ E_{x||l}^{(2,b)}(x, z) \end{pmatrix} = ib \sum_{n=0}^{\infty} \cos \left[ \frac{n\pi}{b} \left( x - \frac{W + a - b}{2} - lL \right) \right] \times \begin{pmatrix} \omega/c & \omega/c \\ \nu_n^{(b)} & -\nu_n^{(b)} \end{pmatrix} \begin{pmatrix} B_n^{(+,l)} \exp[i\nu_n^{(b)} z] \\ B_n^{(-,l)} \exp[-i\nu_n^{(b)}(z - W)] \end{pmatrix}. \quad (10)$$

Here  $\nu_n^{(b)} = \sqrt{\left(\frac{\omega}{c}\right)^2 - \left(\frac{n\pi}{b}\right)^2}$ ,  $B_n^{(\pm, l)}$  stand for the amplitudes of forward- and backward-propagating waves of the  $n$ th eigenmode in slit  $l$ . Matching the boundary conditions at the surfaces of the metal film  $z = 0$  and  $z = W$  (continuity of the tangential components of the electric and magnetic fields at slits and condition  $E_x \equiv 0$  beyond the slits, details can be found in Ref. [1]), and using the Bloch theorem  $A_n^{(\pm, l)} = A_n^{(\pm, 0)} \exp(ik_x lL)$ ,  $B_n^{(\pm, l)} = B_n^{(\pm, 0)} \exp(ik_x lL)$ , it is possible to obtain the matrix equations for the amplitudes of the waveguides modes,

$$\sum_{n=0}^{\infty} \hat{U}_{n', n} \begin{pmatrix} A_n^{(+, 0)} \\ A_n^{(-, 0)} \\ B_n^{(+, 0)} \\ B_n^{(-, 0)} \end{pmatrix} = \left[ \begin{pmatrix} \hat{F}_0 \end{pmatrix}_{11} - \frac{\begin{pmatrix} \hat{F}_0 \end{pmatrix}_{21} \begin{pmatrix} \hat{F}_0 \end{pmatrix}_{12}}{\begin{pmatrix} \hat{F}_0 \end{pmatrix}_{22}} \right] H_y^{(i)} \begin{pmatrix} \overline{P_{n'|k_x}^{(a)}} \\ \overline{P_{n'|k_x}^{(b)}} \\ 0 \\ 0 \end{pmatrix}.$$

Here elements of matrix  $\hat{U}_{n',n}$  can be represented as

$$\begin{aligned}
\left(\hat{U}_{n',n}\right)_{11} &= \delta_{n',n} \frac{1 + \delta_{n',0}}{2} \frac{i\omega}{c} a - \frac{ia^2}{L} \nu_n^{(a)} \sum_{m=-\infty}^{\infty} \frac{\left(\hat{F}_m\right)_{12}}{\left(\hat{F}_m\right)_{22}} P_{n||k_x+2\pi m/L}^{(a)} \overline{P_{n'||k_x+2\pi m/L}^{(a)}}, \\
\left(\hat{U}_{n',n}\right)_{12} &= \exp \left[ i\nu_n^{(a)} W \right] \left\{ \delta_{n',n} \frac{1 + \delta_{n',0}}{2} \frac{i\omega}{c} a + \frac{ia^2}{L} \nu_n^{(a)} \sum_{m=-\infty}^{\infty} \frac{\left(\hat{F}_m\right)_{12}}{\left(\hat{F}_m\right)_{22}} P_{n||k_x+2\pi m/L}^{(a)} \overline{P_{n'||k_x+2\pi m/L}^{(a)}} \right\}, \\
\left(\hat{U}_{n',n}\right)_{13} &= -\frac{ib^2}{L} \nu_n^{(b)} \sum_{m=-\infty}^{\infty} \frac{\left(\hat{F}_m\right)_{12}}{\left(\hat{F}_m\right)_{22}} P_{n||k_x+2\pi m/L}^{(b)} \overline{P_{n'||k_x+2\pi m/L}^{(a)}}, \\
\left(\hat{U}_{n',n}\right)_{14} &= -\exp \left[ i\nu_n^{(b)} W \right] \left(\hat{U}_{n',n}\right)_{13}, \\
\left(\hat{U}_{n',n}\right)_{21} &= -\frac{ia^2}{L} \nu_n^{(a)} \sum_{m=-\infty}^{\infty} \frac{\left(\hat{F}_m\right)_{12}}{\left(\hat{F}_m\right)_{22}} P_{n||k_x+2\pi m/L}^{(a)} \overline{P_{n'||k_x+2\pi m/L}^{(b)}}, \\
\left(\hat{U}_{n',n}\right)_{22} &= -\exp \left[ i\nu_n^{(a)} W \right] \left(\hat{U}_{n',n}\right)_{21}, \\
\left(\hat{U}_{n',n}\right)_{23} &= \delta_{n',n} \frac{1 + \delta_{n',0}}{2} \frac{i\omega}{c} b - \frac{ib^2}{L} \nu_n^{(b)} \sum_{m=-\infty}^{\infty} \frac{\left(\hat{F}_m\right)_{12}}{\left(\hat{F}_m\right)_{22}} P_{n||k_x+2\pi m/L}^{(b)} \overline{P_{n'||k_x+2\pi m/L}^{(b)}}, \\
\left(\hat{U}_{n',n}\right)_{24} &= \exp \left[ i\nu_n^{(b)} W \right] \left\{ \delta_{n',n} \frac{1 + \delta_{n',0}}{2} \frac{i\omega}{c} b + \frac{ib^2}{L} \nu_n^{(b)} \sum_{m=-\infty}^{\infty} \frac{\left(\hat{F}_m\right)_{12}}{\left(\hat{F}_m\right)_{22}} P_{n||k_x+2\pi m/L}^{(b)} \overline{P_{n'||k_x+2\pi m/L}^{(b)}} \right\}, \\
\\
\left(\hat{U}_{n',n}\right)_{31} &= \exp \left[ i\nu_n^{(a)} W \right] \left\{ \delta_{n',n} \frac{1 + \delta_{n',0}}{2} \frac{i\omega}{c} a - \frac{ia^2}{L} \nu_n^{(a)} \sum_{m=-\infty}^{\infty} \frac{\left(\hat{F}_m^{(tot)}\right)_{11}}{\left(\hat{F}_m^{(tot)}\right)_{21}} P_{n||k_x+2\pi m/L}^{(a)} \overline{P_{n'||k_x+2\pi m/L}^{(a)}} \right\}, \\
\left(\hat{U}_{n',n}\right)_{32} &= \delta_{n',n} \frac{1 + \delta_{n',0}}{2} \frac{i\omega}{c} a + \frac{ia^2}{L} \nu_n^{(a)} \sum_{m=-\infty}^{\infty} \frac{\left(\hat{F}_m^{(tot)}\right)_{11}}{\left(\hat{F}_m^{(tot)}\right)_{21}} P_{n||k_x+2\pi m/L}^{(a)} \overline{P_{n'||k_x+2\pi m/L}^{(a)}}, \\
\left(\hat{U}_{n',n}\right)_{34} &= \frac{ib^2}{L} \sum_{n=0}^{\infty} \nu_n^{(b)} \sum_{m=-\infty}^{\infty} \frac{\left(\hat{F}_m^{(tot)}\right)_{11}}{\left(\hat{F}_m^{(tot)}\right)_{21}} P_{n||k_x+2\pi m/L}^{(b)} \overline{P_{n'||k_x+2\pi m/L}^{(a)}}, \\
\left(\hat{U}_{n',n}\right)_{33} &= -\exp \left[ i\nu_n^{(b)} W \right] \left(\hat{U}_{n',n}\right)_{34},
\end{aligned}$$

$$\begin{aligned}
(\hat{U}_{n',n})_{42} &= \frac{ia^2}{L} \nu_n^{(a)} \sum_{m=-\infty}^{\infty} \frac{(\hat{F}_m^{(tot)})_{11}}{(\hat{F}_m^{(tot)})_{21}} P_{n||k_x+2\pi m/L}^{(a)} \overline{P_{n'||k_x+2\pi m/L}^{(b)}}, \\
(\hat{U}_{n',n})_{41} &= -\exp[i\nu_n^{(a)}W] (\hat{U}_{n',n})_{42}, \\
(\hat{U}_{n',n})_{43} &= \exp[i\nu_n^{(b)}W] \left\{ \delta_{n',n} \frac{1+\delta_{n',0}}{2} \frac{i\omega}{c} b - \frac{ib^2}{L} \nu_n^{(b)} \sum_{m=-\infty}^{\infty} \frac{(\hat{F}_m^{(tot)})_{11}}{(\hat{F}_m^{(tot)})_{21}} P_{n||k_x+2\pi m/L}^{(b)} \overline{P_{n'||k_x+2\pi m/L}^{(b)}} \right\}, \\
(\hat{U}_{n',n})_{44} &= \delta_{n',n} \frac{1+\delta_{n',0}}{2} \frac{i\omega}{c} b + \frac{ib^2}{L} \nu_n^{(b)} \sum_{m=-\infty}^{\infty} \frac{(\hat{F}_m^{(tot)})_{11}}{(\hat{F}_m^{(tot)})_{21}} P_{n||k_x+2\pi m/L}^{(b)} \overline{P_{n'||k_x+2\pi m/L}^{(b)}}.
\end{aligned}$$

The parameters  $P_{n||k_x+2\pi m/L}^{(a)}$ ,  $P_{n||k_x+2\pi m/L}^{(b)}$  are different for even and odd  $n$ . Namely, when  $n$  is even

$$\begin{aligned}
P_{n||k_x+2\pi m/L}^{(a)} &= \frac{2}{a} \exp\left[i\frac{W+b}{2}\left(k_x + \frac{2\pi m}{L}\right)\right] \frac{\left(k_x + \frac{2\pi m}{L}\right) \sin\left[\left(k_x + \frac{2\pi m}{L}\right) \frac{a}{2}\right]}{\left(k_x + \frac{2\pi m}{L}\right)^2 - \left(\frac{n\pi}{a}\right)^2}, \\
P_{n||k_x+2\pi m/L}^{(b)} &= \frac{2}{b} \exp\left[-i\frac{W+a}{2}\left(k_x + \frac{2\pi m}{L}\right)\right] \frac{\left(k_x + \frac{2\pi m}{L}\right) \sin\left[\left(k_x + \frac{2\pi m}{L}\right) \frac{b}{2}\right]}{\left(k_x + \frac{2\pi m}{L}\right)^2 - \left(\frac{n\pi}{b}\right)^2}.
\end{aligned}$$

For odd  $n$  we have

$$\begin{aligned}
P_{n||k_x+2\pi m/L}^{(a)} &= \frac{2}{ia} \exp\left[i\frac{W+b}{2}\left(k_x + \frac{2\pi m}{L}\right)\right] \frac{\left(k_x + \frac{2\pi m}{L}\right) \cos\left[\left(k_x + \frac{2\pi m}{L}\right) \frac{a}{2}\right]}{\left(k_x + \frac{2\pi m}{L}\right)^2 - \left(\frac{n\pi}{a}\right)^2}, \\
P_{n||k_x+2\pi m/L}^{(b)} &= \frac{2}{ib} \exp\left[-i\frac{W+a}{2}\left(k_x + \frac{2\pi m}{L}\right)\right] \frac{\left(k_x + \frac{2\pi m}{L}\right) \cos\left[\left(k_x + \frac{2\pi m}{L}\right) \frac{b}{2}\right]}{\left(k_x + \frac{2\pi m}{L}\right)^2 - \left(\frac{n\pi}{b}\right)^2}.
\end{aligned}$$

The amplitudes of the reflected and transmitted waves can be obtained from the amplitudes of waveguide modes as

$$\begin{aligned}
H_{y||m}^{(r)} &= \frac{1}{(\hat{F}_m)_{22}} \left[ \frac{ia^2}{L} \sum_{n=0}^{\infty} \nu_n^{(a)} P_{n||k_x+2\pi m/L}^{(a)} \left\{ A_n^{(+,0)} - A_n^{(-,0)} \exp[i\nu_n^{(a)}W] \right\} + \right. \\
&\quad \left. + \frac{ib^2}{L} \sum_{n=0}^{\infty} \nu_n^{(b)} P_{n||k_x+2\pi m/L}^{(b)} \left\{ B_n^{(+,0)} - B_n^{(-,0)} \exp[i\nu_n^{(b)}W] \right\} - (\hat{F}_m^{(1)})_{21} H_y^{(i)} \delta_{m,0} \right],
\end{aligned} \tag{11}$$

$$\begin{aligned}
H_{y||m}^{(t)} &= \frac{1}{(\hat{F}_m^{(tot)})_{21}} \left[ \frac{ia^2}{L} \sum_{n=0}^{\infty} \nu_n^{(a)} P_{n||k_x+2\pi m/L}^{(a)} \left\{ A_n^{(+,0)} \exp[i\nu_n^{(a)}W] - A_n^{(-,0)} \right\} + \right. \\
&\quad \left. + \frac{ib^2}{L} \sum_{n=0}^{\infty} \nu_n^{(b)} P_{n||k_x+2\pi m/L}^{(b)} \left\{ B_n^{(+,0)} \exp[i\nu_n^{(b)}W] - B_n^{(-,0)} \right\} \right].
\end{aligned} \tag{12}$$

The reflectance and transmittance coefficients can be obtained from Eqs. (11) and (12) as

$$R = \left[ p_0 |H_y^{(i)}|^2 \right]^{-1} \text{Re} \left\{ \sum_{m=-\infty}^{\infty} p_m |H_{y||m}^{(r)}|^2 \right\}, \tag{13}$$

$$T = \left[ p_0 |H_y^{(i)}|^2 \right]^{-1} \text{Re} \left\{ \sum_{m=-\infty}^{\infty} p_m |H_{y||m}^{(t)}|^2 \right\}, \tag{14}$$

while the loss function is defined as imaginary part of the reflected wave's magnetic field at point  $x = 0$ , divided by incident wave's amplitude, i.e.  $\text{Im} \left\{ \sum_{m=-\infty}^{\infty} H_{y||m}^{(r)} / H_y^{(i)} \right\}$ .

The absorbance  $A = 1 - R - T$  of the considered structure is shown at Fig. 2. As seen, the coincidence between the numerical (dashed lines) and semi-analytical (solid lines) results is excellent. In this figure the absorbance maxima

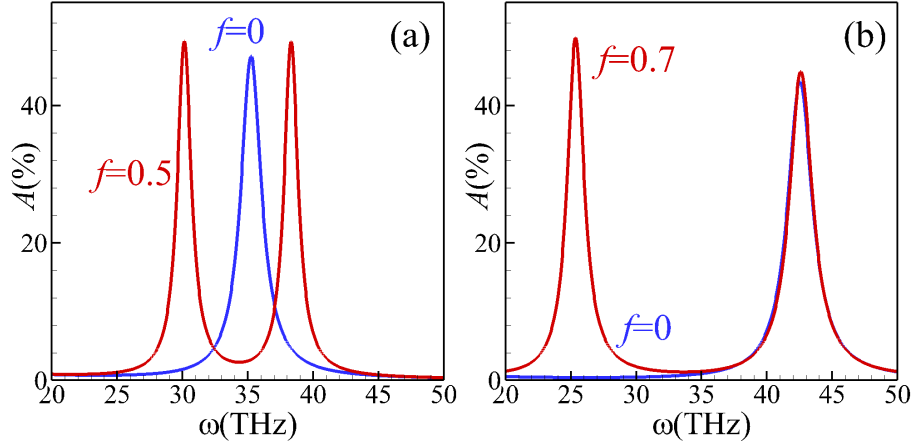

FIG. 2. Absorbance  $A$  versus frequency  $\omega$  of the structure, depicted in Fig. 1 for normal incidence ( $k_x = 0$ ), calculated by the semi-analytical (solid lines) or numerical (dashed lines) methods. The parameters of the structure in panel (a) are:  $E_F = 0.6$  eV,  $a = 75$  nm,  $b = 75$  nm (blue lines, which corresponds to  $f = 0$ ), or  $a = 112.5$  nm,  $b = 37.5$  nm (red lines, which corresponds to  $f = 0.5$ ). The dependencies in panel (b) are calculated for the parameters  $E_F = 0.4$  eV,  $a = 10$  nm,  $b = 10$  nm (blue line, which corresponds to  $f = 0$ ), or  $a = 17$  nm,  $b = 3$  nm (red line, which corresponds to  $f = 0.7$ ). In both panels  $W = 75$  nm,  $d = 3$  nm,  $\gamma = 3$  meV.

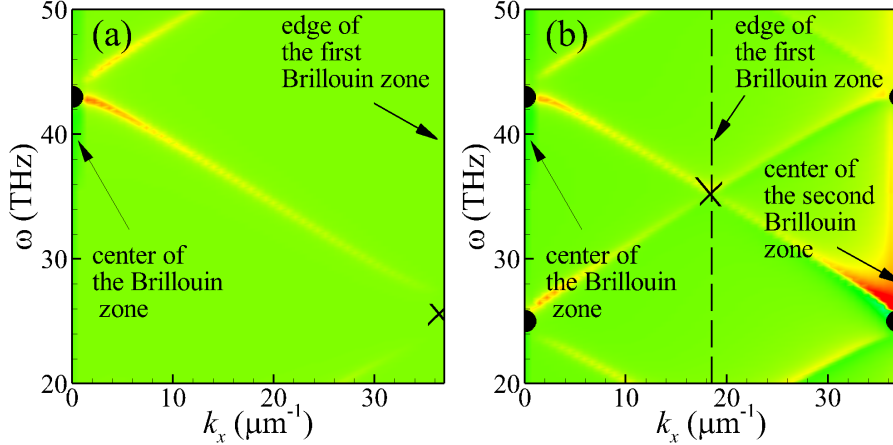

FIG. 3. Loss function (depicted by color map) versus frequency  $\omega$  and in-plane wavevector  $k_x$  for equal values of  $a$  and  $b$  (a), or nonequal  $a \neq b$  (b). The parameters are the same as in Fig. 2.

correspond to the excitation of surface plasmon-polaritons. In more details, when for some particular frequency  $\omega$  the in-plane wavevector of one of the diffracted harmonics  $k_x + 2\pi m/L$  coincides with the surface plasmon-polariton eigenvalue (obtained from the dispersion relation), the resonant excitation of surface plasmon-polariton takes place. Hence, the energy of incident wave is transformed into the energy of excited surface plasmon-polariton, last fact is revealed in the maximum of absorbance at this particular frequency  $\omega$ . When widths of the neighbouring slits are equal ( $a = b$  and, hence,  $f = 0$ ), the spectrum of absorption (blue line) contain one maximum at  $\omega \approx 35$  THz [Fig. 2(a)], or  $\omega \approx 43$  THz [Fig. 2(b)]. When widths of neighbouring peaks are not equal,  $a \neq b$  and  $f \neq 0$ , the high-frequency maximum turns to be blue-shifted (see red lines in Fig. 2), and an additional low-frequency peak at  $\omega \approx 30$  THz [Fig. 2(a)], or  $\omega \approx 25$  THz [Fig. 2(b)] appears in the spectrum.

When  $a = b$ , the period of the structure is equal to  $D = L/2$ . The respective band structure is represented in Fig. 3(a). In this case the center of the first Brillouin zone  $k_x = 0$  coincides with left margem of Fig. 3(a), and the edge of the first Brillouin zone  $k_x = \pi/D = 2\pi/L \approx 40 \mu\text{m}^{-1}$  corresponds to the right margem of Fig. 3(a). Also from Fig. 3(a) one can see, that one of the bands starts at frequency  $\omega \approx 25$  THz (at  $k_x = 2\pi/L$ ) and ends at  $\omega \approx 43$  THz (at  $k_x = 0$ ). For normal incidence it is possible to excite the mode, which corresponds to the crossing of band structure with scanlines  $k_x = 2\pi m/D$  (here  $m$  is integer). In other words, due to the periodicity of band structure with period

$2\pi/D$  it is possible to excite modes, which lie at center of the first Brillouin zone. Modes at the edge of the first Brillouin zone can not be excited at normal incidence. As a result, mode at  $\omega \approx 43$  THz (depicted by the filled circle) can be excited, but mode at  $\omega \approx 25$  THz (depicted by cross) can not be excited at normal incidence. This results in only one absorption peak, like depicted by blue lines in Fig. 2.

When  $a \neq b$ , the period of the structure is equal to  $D = L$ . The respective band structure is represented in Fig. 3(b). In this case the center of the first Brillouin zone  $k_x = 0$  coincides with left margem of the panel, but the edge of the first Brillouin zone  $\pi/D = \pi/L \approx 20 \mu\text{m}^{-1}$  corresponds to the center of Fig. 3(b). Right margem of Fig. 3(b),  $k_x = 2\pi/L \approx 40 \mu\text{m}^{-1}$  corresponds to the center of second Brillouin zone. As one can see, nonequality of neighbouring slits leads to the band folding: now band edge  $\omega \approx 25$  THz as well as that  $\omega \approx 43$  THz lie at the center of the first Brillouin zone and both can be excited at normal incidence, which explains two peaks at Fig. 2, when  $a \neq b$  (red lines).

## II. NUMERICAL CALCULATIONS

The numerical simulations were implemented in COMSOL Multiphysics, a finite element method solver. Three different types of simulations are performed within the wave optics module. Graphene was simulated as a 2D surface with a Drude like optical conductivity. For all the presented numerical calculations, the relaxation rate of graphene's optical conductivity is set to  $\gamma=3$  meV.

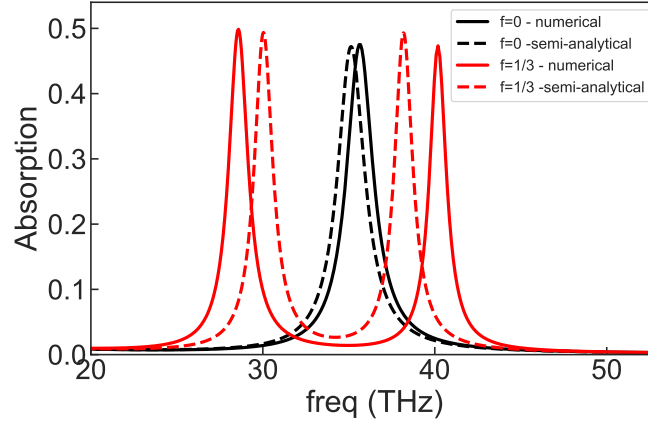

FIG. 4. Comparison between the absorption spectra of the numerical calculations (solid-line) and semi-analytical calculations (dashed-line) for  $f=0$  (black) and  $f=-2/3$  (red)

For the periodic structures, the setup includes Floquet periodic boundary conditions. For the band-structure, we used the eigenfrequency analysis. To avoid excessive numerical issues with the non-linearity of the equations, for the eigenfrequency calculations we considered a lossless version of silver. The numerical and semi-analytical spectra were shifted by a constant wave-length  $\lambda_0$ . The numerical spectra was then adjusted according to the semi-analytical data, which was also consistent with the numerical absorption spectra.

For the Zak phase calculations, we considered a periodic system with Floquet  $k$  vectors covering the 1st Brillouin zone. The eigen-fields for each  $k$  and  $z = z_0$  were then used for the calculation described in the main text. To obtain the periodic part of the electric field, it was multiplied by  $e^{(-kx)}$ . For the absorption calculations A periodic port excites a TM electromagnetic wave and the total transmission, reflection and absorption are calculated. For the finite systems, PEC boundaries are considered, instead of the periodic boundary conditions.

### III. ADDITIONAL FIGURES

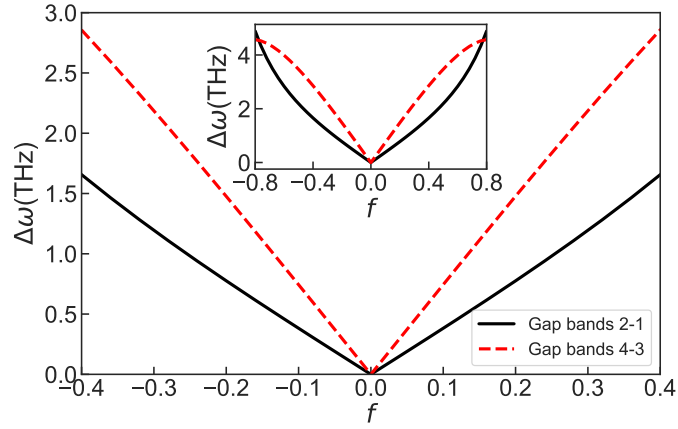

FIG. 5. Linear variation of the gap  $\Delta\omega$  between the plasmonic bands 1- 2 (solid line) and 3-4 (dashed line) as a function of  $f$  for small values of  $f$ . The inset shows  $\Delta\omega \times f$  for  $f = [-0.8, 0.8]$ .

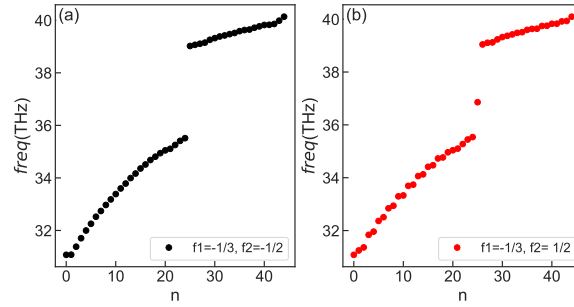

FIG. 6. Energy spectrum of a finite system containing (a) 20 unit cells with  $f_1=-2/3$  and 20 unit cells with  $f_2=-1/2$  and (b) 20 unit cells with  $f_1=-2/3$  and 20 unit cells with  $f = 1/2$ . For  $\text{sgn}(f_1)=\text{sgn}(f_2)$ , the system does not have mid-gap states. For  $\text{sgn}(f_1) \neq \text{sgn}(f_2)$  the system presents a mid-gap state.

- 
- [1] Yuliy V. Bludov, Nuno M. R. Peres, and Mikhail I. Vasilevskiy. Excitation of localized graphene plasmons by a metallic slit. *Physical Review B*, 101(7):075415, feb 2020.
